# Supplementary material
Source: MDPI journal article supplement (https://www.mdpi.com/2313-0105/9/10/492)
Supplement: s1 [file s1]

## **Chemically and Physically Crosslinked Inorganic/Polymer Hybrid Solvent-Free Electrolytes**

Yamato Kanai<sup>1</sup>, Koji Hiraoka<sup>1</sup>, Mutsuhiro Matsuyama<sup>2</sup>, and Shiro Seki<sup>1,\*</sup>

<sup>1</sup>Graduate School of Applied Chemistry and Chemical Engineering, Kogakuin University, 2665-1 Nakano-machi, Hachioji-shi, Tokyo 192-0015, Japan.

<sup>2</sup>Sumitomo Bakelite Co. Ltd., 5-8 Higashi-Shinagawa 2-chome, Shinagawa-ku, Tokyo 140-0002, Japan.

\* Corresponding author: shiro-seki@cc.kogakuin.ac.jp

**Table S1** The  $\sigma$  values of P(EO/PO) /  $x$  wt% LICGC electrolytes at each temperatures

| <i>Temp. / K</i> | $\sigma / \text{S cm}^{-1}$                                                            |                                                                                        |                                                                                        |                                                                                        |
|------------------|----------------------------------------------------------------------------------------|----------------------------------------------------------------------------------------|----------------------------------------------------------------------------------------|----------------------------------------------------------------------------------------|
|                  | $x=0$                                                                                  | $x=50$                                                                                 | $x=100$                                                                                | $x=150$                                                                                |
| <b>353</b>       | $5.70 \times 10^{-4}$<br>Max :<br>$6.22 \times 10^{-4}$<br>Min : $5.30 \times 10^{-4}$ | $2.32 \times 10^{-4}$<br>Max :<br>$2.55 \times 10^{-4}$<br>Min : $2.09 \times 10^{-4}$ | $4.26 \times 10^{-4}$<br>Max :<br>$5.21 \times 10^{-4}$<br>Min : $3.46 \times 10^{-4}$ | $3.01 \times 10^{-4}$<br>Max :<br>$3.28 \times 10^{-4}$<br>Min : $2.79 \times 10^{-4}$ |
| <b>343</b>       | $3.69 \times 10^{-4}$<br>Max :<br>$4.06 \times 10^{-4}$<br>Min : $3.42 \times 10^{-4}$ | $1.59 \times 10^{-4}$<br>Max :<br>$1.69 \times 10^{-4}$<br>Min : $1.48 \times 10^{-4}$ | $2.87 \times 10^{-4}$<br>Max :<br>$3.49 \times 10^{-4}$<br>Min : $2.35 \times 10^{-4}$ | $2.09 \times 10^{-4}$<br>Max :<br>$2.25 \times 10^{-4}$<br>Min : $1.97 \times 10^{-4}$ |
| <b>333</b>       | $2.39 \times 10^{-4}$<br>Max :<br>$2.51 \times 10^{-4}$<br>Min : $2.25 \times 10^{-4}$ | $1.01 \times 10^{-4}$<br>Max :<br>$1.12 \times 10^{-4}$<br>Min : $9.01 \times 10^{-5}$ | $1.75 \times 10^{-4}$<br>Max :<br>$2.05 \times 10^{-4}$<br>Min : $1.45 \times 10^{-4}$ | $1.32 \times 10^{-4}$<br>Max :<br>$1.52 \times 10^{-4}$<br>Min : $1.20 \times 10^{-4}$ |
| <b>323</b>       | $1.47 \times 10^{-4}$<br>Max :<br>$1.60 \times 10^{-4}$<br>Min : $1.38 \times 10^{-4}$ | $5.92 \times 10^{-5}$<br>Max :<br>$6.74 \times 10^{-5}$<br>Min : $5.06 \times 10^{-5}$ | $9.71 \times 10^{-5}$<br>Max :<br>$1.16 \times 10^{-4}$<br>Min : $7.81 \times 10^{-5}$ | $7.64 \times 10^{-5}$<br>Max :<br>$9.31 \times 10^{-5}$<br>Min : $6.59 \times 10^{-5}$ |
| <b>313</b>       | $7.93 \times 10^{-5}$<br>Max :<br>$8.91 \times 10^{-5}$<br>Min : $7.22 \times 10^{-5}$ | $2.90 \times 10^{-5}$<br>Max :<br>$3.23 \times 10^{-5}$<br>Min : $2.49 \times 10^{-5}$ | $4.77 \times 10^{-5}$<br>Max :<br>$5.71 \times 10^{-5}$<br>Min : $3.8 \times 10^{-5}$  | $3.87 \times 10^{-5}$<br>Max :<br>$4.96 \times 10^{-5}$<br>Min : $3.21 \times 10^{-5}$ |
| <b>308</b>       | $5.50 \times 10^{-5}$<br>Max :<br>$6.21 \times 10^{-5}$<br>Min : $4.88 \times 10^{-5}$ | $1.96 \times 10^{-5}$<br>Max :<br>$2.19 \times 10^{-5}$<br>Min : $1.67 \times 10^{-5}$ | $3.38 \times 10^{-5}$<br>Max :<br>$3.78 \times 10^{-5}$<br>Min : $3.01 \times 10^{-5}$ | $2.57 \times 10^{-5}$<br>Max :<br>$3.37 \times 10^{-5}$<br>Min : $2.12 \times 10^{-5}$ |
| <b>303</b>       | $3.66 \times 10^{-5}$<br>Max :<br>$4.17 \times 10^{-5}$<br>Min : $3.16 \times 10^{-5}$ | $1.27 \times 10^{-5}$<br>Max :<br>$1.43 \times 10^{-5}$<br>Min : $1.05 \times 10^{-5}$ | $2.03 \times 10^{-5}$<br>Max :<br>$2.46 \times 10^{-5}$<br>Min : $1.61 \times 10^{-5}$ | $1.66 \times 10^{-5}$<br>Max :<br>$2.19 \times 10^{-5}$<br>Min : $1.35 \times 10^{-5}$ |
| <b>298</b>       | $2.32 \times 10^{-5}$<br>Max :<br>$2.68 \times 10^{-5}$<br>Min : $1.94 \times 10^{-5}$ | $7.57 \times 10^{-6}$<br>Max :<br>$8.64 \times 10^{-6}$<br>Min : $6.55 \times 10^{-6}$ | $1.22 \times 10^{-5}$<br>Max :<br>$1.46 \times 10^{-5}$<br>Min : $9.71 \times 10^{-6}$ | $1.00 \times 10^{-5}$<br>Max :<br>$1.33 \times 10^{-5}$<br>Min : $8.16 \times 10^{-6}$ |
| <b>293</b>       | $1.37 \times 10^{-5}$<br>Max :<br>$1.63 \times 10^{-5}$<br>Min : $1.13 \times 10^{-5}$ | $4.48 \times 10^{-6}$<br>Max :<br>$5.21 \times 10^{-6}$<br>Min : $3.78 \times 10^{-6}$ | $7.00 \times 10^{-6}$<br>Max :<br>$8.35 \times 10^{-6}$<br>Min : $5.58 \times 10^{-6}$ | $5.92 \times 10^{-6}$<br>Max :<br>$7.99 \times 10^{-6}$<br>Min : $4.63 \times 10^{-6}$ |
| <b>288</b>       | $7.95 \times 10^{-6}$<br>Max :<br>$9.43 \times 10^{-6}$<br>Min : $6.18 \times 10^{-6}$ | $2.52 \times 10^{-6}$<br>Max :<br>$2.73 \times 10^{-6}$<br>Min : $2.17 \times 10^{-6}$ | $3.78 \times 10^{-6}$<br>Max :<br>$4.61 \times 10^{-6}$<br>Min : $2.92 \times 10^{-6}$ | $3.15 \times 10^{-6}$<br>Max :<br>$4.34 \times 10^{-6}$<br>Min : $2.47 \times 10^{-6}$ |
| <b>283</b>       | $4.24 \times 10^{-6}$<br>Max :<br>$5.11 \times 10^{-6}$<br>Min : $3.16 \times 10^{-6}$ | $1.21 \times 10^{-6}$<br>Max :<br>$1.51 \times 10^{-6}$<br>Min : $1.08 \times 10^{-6}$ | $1.91 \times 10^{-6}$<br>Max :<br>$2.31 \times 10^{-6}$<br>Min : $1.48 \times 10^{-6}$ | $1.61 \times 10^{-6}$<br>Max :<br>$2.24 \times 10^{-6}$<br>Min : $1.26 \times 10^{-6}$ |

(Continued)

**Table S1** The  $\sigma$  values of P(EO/PO) /  $x$  wt% LICGC electrolytes at each temperatures

|            |                                                                                     |                                                                                     |                                                                                      |                                                                                     |
|------------|-------------------------------------------------------------------------------------|-------------------------------------------------------------------------------------|--------------------------------------------------------------------------------------|-------------------------------------------------------------------------------------|
| <b>278</b> | $2.09 \times 10^{-6}$<br>Max : $2.56 \times 10^{-6}$<br>Min : $1.48 \times 10^{-6}$ | $5.75 \times 10^{-7}$<br>Max : $7.22 \times 10^{-7}$<br>Min : $4.95 \times 10^{-7}$ | $8.88 \times 10^{-7}$<br>Max : $1.09 \times 10^{-6}$<br>Min : $6.65 \times 10^{-7}$  | $7.47 \times 10^{-7}$<br>Max : $1.06 \times 10^{-6}$<br>Min : $5.83 \times 10^{-7}$ |
| <b>273</b> | $9.40 \times 10^{-7}$<br>Max : $1.18 \times 10^{-6}$<br>Min : $6.28 \times 10^{-7}$ | $2.46 \times 10^{-7}$<br>Max : $3.05 \times 10^{-7}$<br>Min : $2.11 \times 10^{-7}$ | $3.65 \times 10^{-7}$<br>Max : $4.55 \times 10^{-7}$<br>Min : $2.64 \times 10^{-7}$  | $3.22 \times 10^{-7}$<br>Max : $4.72 \times 10^{-7}$<br>Min : $2.41 \times 10^{-7}$ |
| <b>268</b> | $3.80 \times 10^{-7}$<br>Max : $4.84 \times 10^{-7}$<br>Min : $2.36 \times 10^{-7}$ | $9.29 \times 10^{-8}$<br>Max : $1.03 \times 10^{-7}$<br>Min : $7.54 \times 10^{-8}$ | $1.34 \times 10^{-7}$<br>Max : $1.72 \times 10^{-7}$<br>Min : $9.48 \times 10^{-8}$  | $1.20 \times 10^{-7}$<br>Max : $1.75 \times 10^{-7}$<br>Min : $8.93 \times 10^{-8}$ |
| <b>263</b> | $1.36 \times 10^{-7}$<br>Max : $1.78 \times 10^{-7}$<br>Min : $7.57 \times 10^{-8}$ | $2.68 \times 10^{-8}$<br>Max : $3.23 \times 10^{-8}$<br>Min : $2.24 \times 10^{-8}$ | $4.70 \times 10^{-8}$<br>Max : $6.37 \times 10^{-8}$<br>Min : $2.53 \times 10^{-8}$  | $3.90 \times 10^{-8}$<br>Max : $6.11 \times 10^{-8}$<br>Min : $2.77 \times 10^{-8}$ |
| <b>258</b> | $4.23 \times 10^{-8}$<br>Max : $5.67 \times 10^{-8}$<br>Min : $2.18 \times 10^{-8}$ | $6.14 \times 10^{-9}$<br>Max : $8.67 \times 10^{-9}$<br>Min : $2.94 \times 10^{-9}$ | $1.13 \times 10^{-8}$<br>Max : $1.54 \times 10^{-8}$<br>Min : $5.86 \times 10^{-9}$  | $1.06 \times 10^{-8}$<br>Max : $1.71 \times 10^{-8}$<br>Min : $7.23 \times 10^{-9}$ |
| <b>253</b> | $1.18 \times 10^{-8}$<br>Max : $1.59 \times 10^{-8}$<br>Min : $5.79 \times 10^{-9}$ | $3.77 \times 10^{-10}$<br>Max : -<br>Min : -                                        | $2.65 \times 10^{-9}$<br>Max : $3.97 \times 10^{-9}$<br>Min : $9.97 \times 10^{-10}$ | $2.02 \times 10^{-9}$<br>Max : -<br>Min : -                                         |
| <b>250</b> | $5.41 \times 10^{-9}$<br>Max : $7.19 \times 10^{-9}$<br>Min : $2.83 \times 10^{-9}$ | -                                                                                   | $1.79 \times 10^{-9}$<br>Max : -<br>Min : -                                          | $9.04 \times 10^{-10}$<br>Max : -<br>Min : -                                        |
| <b>247</b> | $2.75 \times 10^{-9}$<br>Max : $3.73 \times 10^{-9}$<br>Min : $1.69 \times 10^{-9}$ | -                                                                                   | $7.99 \times 10^{-10}$<br>Max : -<br>Min : -                                         | -                                                                                   |
| <b>244</b> | $1.65 \times 10^{-9}$<br>Max : $1.99 \times 10^{-9}$<br>Min : $1.34 \times 10^{-9}$ | -                                                                                   | $5.00 \times 10^{-10}$<br>Max : -<br>Min : -                                         | -                                                                                   |

**Table S2** The  $\sigma$  values of P(EO/PO)-PEO<sub>3</sub> /  $x$  wt% LICGC electrolytes at each temperatures

| <i>Temp. / K</i> | $\sigma / \text{S cm}^{-1}$                                                         |                                                                                     |                                                                                     |
|------------------|-------------------------------------------------------------------------------------|-------------------------------------------------------------------------------------|-------------------------------------------------------------------------------------|
|                  | $x=0$                                                                               | $x=50$                                                                              | $x=100$                                                                             |
| <b>353</b>       | $3.34 \times 10^{-4}$<br>Max : $3.51 \times 10^{-4}$<br>Min : $3.18 \times 10^{-4}$ | $7.34 \times 10^{-5}$<br>Max : $8.92 \times 10^{-5}$<br>Min : $5.74 \times 10^{-5}$ | $6.51 \times 10^{-5}$<br>Max : $7.53 \times 10^{-5}$<br>Min : $5.70 \times 10^{-5}$ |
| <b>343</b>       | $2.14 \times 10^{-4}$<br>Max : $2.24 \times 10^{-4}$<br>Min : $2.06 \times 10^{-4}$ | $4.87 \times 10^{-5}$<br>Max : $5.71 \times 10^{-5}$<br>Min : $3.60 \times 10^{-5}$ | $4.62 \times 10^{-5}$<br>Max : $5.19 \times 10^{-5}$<br>Min : $4.48 \times 10^{-5}$ |
| <b>333</b>       | $1.19 \times 10^{-4}$<br>Max : $1.24 \times 10^{-4}$<br>Min : $1.13 \times 10^{-4}$ | $3.09 \times 10^{-5}$<br>Max : $3.65 \times 10^{-5}$<br>Min : $2.23 \times 10^{-5}$ | $3.00 \times 10^{-5}$<br>Max : $3.31 \times 10^{-5}$<br>Min : $2.79 \times 10^{-5}$ |
| <b>323</b>       | $5.92 \times 10^{-5}$<br>Max : $6.20 \times 10^{-5}$<br>Min : $5.48 \times 10^{-5}$ | $1.83 \times 10^{-5}$<br>Max : $2.08 \times 10^{-5}$<br>Min : $1.44 \times 10^{-5}$ | $1.79 \times 10^{-5}$<br>Max : $2.00 \times 10^{-5}$<br>Min : $1.64 \times 10^{-5}$ |
| <b>313</b>       | $2.59 \times 10^{-5}$<br>Max : $2.73 \times 10^{-5}$<br>Min : $2.36 \times 10^{-5}$ | $9.34 \times 10^{-6}$<br>Max : $1.07 \times 10^{-5}$<br>Min : $7.35 \times 10^{-6}$ | $9.57 \times 10^{-6}$<br>Max : $1.06 \times 10^{-5}$<br>Min : $8.68 \times 10^{-6}$ |
| <b>308</b>       | $1.59 \times 10^{-5}$<br>Max : $1.68 \times 10^{-5}$<br>Min : $1.45 \times 10^{-5}$ | $6.25 \times 10^{-6}$<br>Max : $7.12 \times 10^{-6}$<br>Min : $4.78 \times 10^{-6}$ | $6.7 \times 10^{-6}$<br>Max : $7.42 \times 10^{-6}$<br>Min : $5.94 \times 10^{-6}$  |
| <b>303</b>       | $9.39 \times 10^{-6}$<br>Max : $9.94 \times 10^{-6}$<br>Min : $8.48 \times 10^{-6}$ | $4.12 \times 10^{-6}$<br>Max : $4.48 \times 10^{-6}$<br>Min : $3.46 \times 10^{-6}$ | $4.52 \times 10^{-6}$<br>Max : $4.85 \times 10^{-6}$<br>Min : $3.93 \times 10^{-6}$ |
| <b>298</b>       | $5.25 \times 10^{-6}$<br>Max : $5.58 \times 10^{-6}$<br>Min : $4.72 \times 10^{-6}$ | $2.48 \times 10^{-6}$<br>Max : $2.78 \times 10^{-6}$<br>Min : $1.92 \times 10^{-6}$ | $2.87 \times 10^{-6}$<br>Max : $3.12 \times 10^{-6}$<br>Min : $2.44 \times 10^{-6}$ |
| <b>293</b>       | $2.83 \times 10^{-6}$<br>Max : $2.98 \times 10^{-6}$<br>Min : $2.54 \times 10^{-6}$ | $1.43 \times 10^{-6}$<br>Max : $1.62 \times 10^{-6}$<br>Min : $1.12 \times 10^{-6}$ | $1.74 \times 10^{-6}$<br>Max : $1.93 \times 10^{-6}$<br>Min : $1.45 \times 10^{-6}$ |
| <b>288</b>       | $1.39 \times 10^{-6}$<br>Max : $1.47 \times 10^{-6}$<br>Min : $1.24 \times 10^{-6}$ | $7.71 \times 10^{-7}$<br>Max : $8.89 \times 10^{-7}$<br>Min : $5.72 \times 10^{-7}$ | $9.90 \times 10^{-7}$<br>Max : $1.11 \times 10^{-6}$<br>Min : $8.16 \times 10^{-7}$ |
| <b>283</b>       | $6.2 \times 10^{-7}$<br>Max : $6.66 \times 10^{-7}$<br>Min : $5.56 \times 10^{-7}$  | $3.91 \times 10^{-7}$<br>Max : $4.60 \times 10^{-7}$<br>Min : $2.89 \times 10^{-7}$ | $5.27 \times 10^{-7}$<br>Max : $6.07 \times 10^{-7}$<br>Min : $4.24 \times 10^{-7}$ |
| <b>278</b>       | $2.59 \times 10^{-7}$<br>Max : $2.82 \times 10^{-7}$<br>Min : $2.21 \times 10^{-7}$ | $1.84 \times 10^{-7}$<br>Max : $2.22 \times 10^{-7}$<br>Min : $1.33 \times 10^{-7}$ | $2.62 \times 10^{-7}$<br>Max : $3.07 \times 10^{-7}$<br>Min : $2.04 \times 10^{-7}$ |
| <b>273</b>       | $8.77 \times 10^{-8}$<br>Max : -<br>Min : -                                         | $7.74 \times 10^{-8}$<br>Max : $9.58 \times 10^{-8}$<br>Min : $5.37 \times 10^{-8}$ | $1.19 \times 10^{-7}$<br>Max : $1.44 \times 10^{-7}$<br>Min : $9.04 \times 10^{-8}$ |

(Continued)

**Table S2** The  $\sigma$  values of P(EO/PO)-PEO<sub>3</sub> /  $x$  wt% LICGC electrolytes at each temperatures

|            |                                              |                                                                                        |                                                                                        |
|------------|----------------------------------------------|----------------------------------------------------------------------------------------|----------------------------------------------------------------------------------------|
| <b>268</b> | $2.71 \times 10^{-8}$<br>Max : -<br>Min : -  | $2.99 \times 10^{-8}$<br>Max : $3.85 \times 10^{-8}$<br>Min : $2.02 \times 10^{-8}$    | $4.81 \times 10^{-8}$<br>Max : $5.84 \times 10^{-8}$<br>Min : $3.51 \times 10^{-8}$    |
| <b>263</b> | $6.91 \times 10^{-9}$<br>Max : -<br>Min : -  | $1.01 \times 10^{-8}$<br>Max : $1.30 \times 10^{-8}$<br>Min : $7.43 \times 10^{-9}$    | $1.74 \times 10^{-8}$<br>Max : $2.12 \times 10^{-8}$<br>Min : $1.24 \times 10^{-8}$    |
| <b>258</b> | $1.47 \times 10^{-9}$<br>Max : -<br>Min : -  | $2.82 \times 10^{-9}$<br>Max : $3.57 \times 10^{-9}$<br>Min : $1.89 \times 10^{-9}$    | $5.24 \times 10^{-9}$<br>Max : $6.18 \times 10^{-9}$<br>Min : $3.94 \times 10^{-9}$    |
| <b>253</b> | $2.33 \times 10^{-10}$<br>Max : -<br>Min : - | $6.29 \times 10^{-10}$<br>Max : $7.42 \times 10^{-10}$<br>Min : $4.76 \times 10^{-10}$ | $1.49 \times 10^{-9}$<br>Max : $2.35 \times 10^{-9}$<br>Min : $8.47 \times 10^{-10}$   |
| <b>250</b> | $6.64 \times 10^{-11}$<br>Max : -<br>Min : - | $2.54 \times 10^{-10}$<br>Max : $4.18 \times 10^{-10}$<br>Min : $1.36 \times 10^{-10}$ | $6.82 \times 10^{-10}$<br>Max : $3.94 \times 10^{-10}$<br>Min : $1.36 \times 10^{-10}$ |
| <b>247</b> | $2.22 \times 10^{-11}$<br>Max : -<br>Min : - | -                                                                                      | -                                                                                      |

**Table S3** The  $\sigma$  values of P(NB/G2) /  $x$  wt% LICGC electrolytes at each temperatures

| <i>Temp. / K</i> | $\sigma / \text{S cm}^{-1}$                                                         |                                                                                      |                                                                                     |
|------------------|-------------------------------------------------------------------------------------|--------------------------------------------------------------------------------------|-------------------------------------------------------------------------------------|
|                  | $x=0$                                                                               | $x=50$                                                                               | $x=100$                                                                             |
| <b>303</b>       | $8.49 \times 10^{-7}$<br>Max : $1.14 \times 10^{-6}$<br>Min : $6.06 \times 10^{-7}$ | $3.83 \times 10^{-7}$<br>Max : $6.46 \times 10^{-7}$<br>Min : $8.78 \times 10^{-8}$  | $1.27 \times 10^{-7}$<br>Max : $1.78 \times 10^{-7}$<br>Min : $5.51 \times 10^{-8}$ |
| <b>298</b>       | $4.48 \times 10^{-7}$<br>Max : $6.02 \times 10^{-7}$<br>Min : $3.22 \times 10^{-7}$ | $2.08 \times 10^{-7}$<br>Max : $3.49 \times 10^{-7}$<br>Min : $4.82 \times 10^{-8}$  | $5.86 \times 10^{-8}$<br>Max : $8.95 \times 10^{-8}$<br>Min : $2.61 \times 10^{-8}$ |
| <b>293</b>       | $2.20 \times 10^{-7}$<br>Max : $2.97 \times 10^{-7}$<br>Min : $1.53 \times 10^{-7}$ | $1.03 \times 10^{-7}$<br>Max : $1.75 \times 10^{-7}$<br>Min : $2.18 \times 10^{-8}$  | $2.81 \times 10^{-8}$<br>Max : $3.95 \times 10^{-8}$<br>Min : $1.45 \times 10^{-8}$ |
| <b>288</b>       | $1.06 \times 10^{-7}$<br>Max : $1.45 \times 10^{-7}$<br>Min : $7.69 \times 10^{-8}$ | $4.74 \times 10^{-8}$<br>Max : $7.92 \times 10^{-8}$<br>Min : $1.03 \times 10^{-8}$  | $1.39 \times 10^{-8}$<br>Max : $1.75 \times 10^{-8}$<br>Min : $6.92 \times 10^{-9}$ |
| <b>283</b>       | $4.70 \times 10^{-8}$<br>Max : $6.38 \times 10^{-8}$<br>Min : $3.34 \times 10^{-8}$ | $1.69 \times 10^{-8}$<br>Max : $3.73 \times 10^{-8}$<br>Min : $4.15 \times 10^{-9}$  | $5.53 \times 10^{-9}$<br>Max : $7.26 \times 10^{-9}$<br>Min : $2.35 \times 10^{-9}$ |
| <b>278</b>       | -                                                                                   | $7.36 \times 10^{-9}$<br>Max : $1.64 \times 10^{-8}$<br>Min : $1.66 \times 10^{-9}$  | $2.50 \times 10^{-9}$<br>Max : $2.90 \times 10^{-9}$<br>Min : $1.73 \times 10^{-9}$ |
| <b>273</b>       | -                                                                                   | $2.92 \times 10^{-9}$<br>Max : $6.30 \times 10^{-9}$<br>Min : $7.38 \times 10^{-10}$ | $1.14 \times 10^{-9}$<br>Max : -<br>Min : -                                         |
| <b>268</b>       | -                                                                                   | $4.9 \times 10^{-10}$<br>Max : -<br>Min : -                                          | $4.7 \times 10^{-10}$<br>Max : -<br>Min : -                                         |
| <b>263</b>       | -                                                                                   | $7.33 \times 10^{-11}$<br>Max : -<br>Min : -                                         | -                                                                                   |
